# Supplementary material
Source: Royal Society of Chemistry journal article supplement (doi:10.1039/d6cp01244b)
Supplement: d6cp01244b1.xlsx [file d6cp01244b1.xlsx]

## Sheet: Sheet1
	Ang (deg)	Elastic	Rotational
E=1eV	0	6.664	109480000
	1	6.832	21280
	2	7	5320
	3	7.196	2363.2
	4	7.364	1330
	5	7.532	851.2
	6	7.728	590.8
	7	7.896	434
	8	8.064	333.2
	9	8.232	263.2
	10	8.4	213.08
	11	8.568	176.4
	12	8.736	148.12
	13	8.904	126.28
	14	9.044	108.92
	15	9.212	95.2
	16	9.352	83.72
	17	9.492	74.2
	18	9.632	66.08
	19	9.772	59.36
	20	9.912	53.76
	21	10.024	48.72
	22	10.136	44.52
	23	10.248	40.88
	24	10.36	37.52
	25	10.444	34.44
	26	10.556	31.92
	27	10.64	29.68
	28	10.724	27.664
	29	10.78	25.844
	30	10.836	24.192
	31	10.92	22.12
	32	10.948	20.16
	33	11.004	18.424
	34	11.032	16.912
	35	11.06	15.54
	36	11.088	14.308
	37	11.116	13.216
	38	11.116	12.236
	39	11.116	11.368
	40	11.116	10.556
	41	11.116	9.828
	42	11.088	9.184
	43	11.06	8.568
	44	11.032	8.036
	45	11.004	7.532
	46	10.948	7.084
	47	10.92	6.664
	48	10.864	6.272
	49	10.808	5.936
	50	10.724	5.6
	51	10.668	5.292
	52	10.584	5.012
	53	10.528	4.76
	54	10.444	4.508
	55	10.36	4.284
	56	10.248	4.088
	57	10.164	3.892
	58	10.08	3.696
	59	9.968	3.528
	60	9.884	3.388
	61	9.772	3.22
	62	9.66	3.08
	63	9.548	2.968
	64	9.436	2.828
	65	9.324	2.7244
	66	9.212	2.6152
	67	9.1	2.5116
	68	8.988	2.4164
	69	8.848	2.324
	70	8.736	2.2372
	71	8.624	2.156
	72	8.512	2.0804
	73	8.372	2.0076
	74	8.26	1.9376
	75	8.148	1.8732
	76	8.008	1.8088
	77	7.896	1.75
	78	7.784	1.694
	79	7.672	1.6408
	80	7.56	1.5904
	81	7.42	1.5428
	82	7.308	1.4952
	83	7.196	1.4532
	84	7.084	1.4112
	85	6.972	1.3692
	86	6.86	1.3328
	87	6.776	1.2964
	88	6.664	1.26
	89	6.552	1.2264
	90	6.44	1.1956
	91	6.356	1.1648
	92	6.244	1.134
	93	6.16	1.106
	94	6.076	1.0808
	95	5.964	1.0528
	96	5.88	1.0304
	97	5.796	1.0052
	98	5.712	0.9828
	99	5.628	0.9604
	100	5.544	0.9408
	101	5.46	0.9184
	102	5.404	0.8988
	103	5.32	0.882
	104	5.264	0.8624
	105	5.18	0.8456
	106	5.124	0.8288
	107	5.04	0.812
	108	4.984	0.798
	109	4.928	0.784
	110	4.872	0.7672
	111	4.816	0.756
	112	4.76	0.742
	113	4.704	0.728
	114	4.676	0.7168
	115	4.62	0.7028
	116	4.564	0.6916
	117	4.536	0.6804
	118	4.48	0.672
	119	4.452	0.6608
	120	4.424	0.6496
	121	4.368	0.6412
	122	4.34	0.63
	123	4.312	0.6216
	124	4.284	0.6132
	125	4.256	0.6048
	126	4.228	0.5964
	127	4.2	0.588
	128	4.172	0.5824
	129	4.144	0.574
	130	4.144	0.5684
	131	4.116	0.56
	132	4.088	0.5544
	133	4.088	0.5488
	134	4.06	0.5404
	135	4.06	0.5348
	136	4.032	0.5292
	137	4.032	0.5236
	138	4.004	0.518
	139	4.004	0.5152
	140	4.004	0.5096
	141	3.976	0.504
	142	3.976	0.4984
	143	3.976	0.4956
	144	3.976	0.49
	145	3.976	0.4872
	146	3.948	0.4816
	147	3.948	0.4788
	148	3.948	0.476
	149	3.948	0.4732
	150	3.948	0.4676
	151	3.948	0.4648
	152	3.948	0.462
	153	3.948	0.4592
	154	3.948	0.4564
	155	3.948	0.4536
	156	3.948	0.4508
	157	3.948	0.448
	158	3.948	0.4452
	159	3.948	0.4452
	160	3.948	0.4424
	161	3.948	0.4396
	162	3.948	0.4396
	163	3.948	0.4368
	164	3.948	0.434
	165	3.948	0.434
	166	3.948	0.4312
	167	3.948	0.4312
	168	3.948	0.4284
	169	3.948	0.4284
	170	3.948	0.4284
	171	3.948	0.4256
	172	3.948	0.4256
	173	3.948	0.4256
	174	3.948	0.4228
	175	3.948	0.4228
	176	3.948	0.4228
	177	3.948	0.4228
	178	3.948	0.4228
	179	3.948	0.4228
	180	3.948	0.4228
E=1.5 eV	0	8.12	164080000
	1	8.316	14168
	2	8.512	3556
	3	8.736	1576.4
	4	8.932	887.6
	5	9.128	568.4
	6	9.324	394.8
	7	9.52	288.4
	8	9.716	222.04
	9	9.912	175.28
	10	10.108	142.24
	11	10.304	117.6
	12	10.472	98.84
	13	10.64	84.28
	14	10.808	72.8
	15	10.976	63.28
	16	11.116	55.72
	17	11.256	49.56
	18	11.396	44.24
	19	11.536	39.76
	20	11.648	35.84
	21	11.76	32.48
	22	11.872	29.68
	23	11.956	27.16
	24	12.04	24.976
	25	12.096	23.044
	26	12.152	21.336
	27	12.208	19.824
	28	12.264	18.452
	29	12.292	17.22
	30	12.32	16.128
	31	12.32	14.756
	32	12.32	13.44
	33	12.32	12.292
	34	12.292	11.256
	35	12.264	10.36
	36	12.236	9.548
	37	12.18	8.82
	38	12.124	8.148
	39	12.068	7.56
	40	11.984	7.028
	41	11.928	6.552
	42	11.816	6.132
	43	11.732	5.712
	44	11.62	5.348
	45	11.508	5.012
	46	11.396	4.732
	47	11.284	4.452
	48	11.144	4.172
	49	11.004	3.948
	50	10.892	3.724
	51	10.752	3.528
	52	10.584	3.332
	53	10.444	3.164
	54	10.276	2.996
	55	10.136	2.856
	56	9.968	2.7216
	57	9.8	2.5928
	58	9.632	2.4724
	59	9.492	2.3576
	60	9.324	2.254
	61	9.156	2.1532
	62	8.988	2.0608
	63	8.82	1.974
	64	8.652	1.8928
	65	8.484	1.8144
	66	8.316	1.7444
	67	8.148	1.6744
	68	7.98	1.61
	69	7.812	1.5484
	70	7.644	1.4924
	71	7.476	1.4392
	72	7.308	1.386
	73	7.168	1.3384
	74	7	1.2908
	75	6.86	1.2488
	76	6.692	1.2068
	77	6.552	1.1676
	78	6.412	1.1312
	79	6.272	1.0948
	80	6.132	1.0612
	81	5.992	1.0276
	82	5.852	0.9968
	83	5.74	0.9688
	84	5.6	0.9408
	85	5.488	0.9128
	86	5.376	0.8876
	87	5.264	0.8624
	88	5.152	0.84
	89	5.04	0.8176
	90	4.928	0.7952
	91	4.844	0.7756
	92	4.732	0.756
	93	4.648	0.7364
	94	4.536	0.7196
	95	4.452	0.7028
	96	4.368	0.686
	97	4.312	0.6692
	98	4.228	0.6552
	99	4.144	0.6412
	100	4.088	0.6272
	101	4.004	0.6132
	102	3.948	0.5992
	103	3.892	0.588
	104	3.836	0.5768
	105	3.78	0.5628
	106	3.724	0.5516
	107	3.668	0.5432
	108	3.612	0.532
	109	3.584	0.5208
	110	3.528	0.5124
	111	3.5	0.504
	112	3.472	0.4928
	113	3.416	0.4844
	114	3.388	0.476
	115	3.36	0.4704
	116	3.332	0.462
	117	3.304	0.4536
	118	3.276	0.448
	119	3.276	0.4396
	120	3.248	0.434
	121	3.22	0.4284
	122	3.22	0.42
	123	3.192	0.4144
	124	3.192	0.4088
	125	3.164	0.4032
	126	3.164	0.3976
	127	3.136	0.392
	128	3.136	0.3892
	129	3.136	0.3836
	130	3.136	0.378
	131	3.136	0.3724
	132	3.108	0.3696
	133	3.108	0.364
	134	3.108	0.3612
	135	3.108	0.3584
	136	3.108	0.3528
	137	3.108	0.35
	138	3.136	0.3472
	139	3.136	0.3416
	140	3.136	0.3388
	141	3.136	0.336
	142	3.136	0.3332
	143	3.136	0.3304
	144	3.136	0.3276
	145	3.164	0.3248
	146	3.164	0.322
	147	3.164	0.3192
	148	3.164	0.3164
	149	3.192	0.3136
	150	3.192	0.3136
	151	3.192	0.3108
	152	3.22	0.308
	153	3.22	0.3052
	154	3.22	0.3052
	155	3.22	0.3024
	156	3.248	0.2996
	157	3.248	0.2996
	158	3.248	0.2968
	159	3.276	0.2968
	160	3.276	0.294
	161	3.276	0.294
	162	3.276	0.2912
	163	3.304	0.2912
	164	3.304	0.2912
	165	3.304	0.2884
	166	3.304	0.2884
	167	3.304	0.2884
	168	3.332	0.2856
	169	3.332	0.2856
	170	3.332	0.2856
	171	3.332	0.2856
	172	3.332	0.2828
	173	3.332	0.2828
	174	3.332	0.2828
	175	3.36	0.2828
	176	3.36	0.2828
	177	3.36	0.2828
	178	3.36	0.2828
	179	3.36	0.2828
	180	3.36	0.2828
E=2 eV	0	9.38	218960000
	1	9.604	10640
	2	9.828	2660
	3	10.052	1181.6
	4	10.276	663.6
	5	10.5	425.6
	6	10.696	296.8
	7	10.92	217.28
	8	11.116	166.32
	9	11.34	131.6
	10	11.536	106.68
	11	11.732	88.2
	12	11.9	74.2
	13	12.068	63.28
	14	12.236	54.6
	15	12.404	47.6
	16	12.544	41.72
	17	12.684	36.96
	18	12.796	33.04
	19	12.908	29.68
	20	12.992	26.852
	21	13.104	24.388
	22	13.16	22.232
	23	13.216	20.384
	24	13.272	18.732
	25	13.3	17.276
	26	13.328	16.016
	27	13.328	14.868
	28	13.328	13.832
	29	13.328	12.908
	30	13.3	12.096
	31	13.244	11.06
	32	13.188	10.08
	33	13.132	9.212
	34	13.048	8.456
	35	12.964	7.756
	36	12.852	7.168
	37	12.74	6.608
	38	12.628	6.132
	39	12.488	5.684
	40	12.348	5.292
	41	12.208	4.928
	42	12.068	4.592
	43	11.9	4.284
	44	11.732	4.004
	45	11.564	3.78
	46	11.368	3.528
	47	11.172	3.332
	48	11.004	3.136
	49	10.808	2.968
	50	10.584	2.7972
	51	10.388	2.646
	52	10.192	2.506
	53	9.996	2.3772
	54	9.772	2.2568
	55	9.576	2.1448
	56	9.352	2.0412
	57	9.156	1.9432
	58	8.932	1.8536
	59	8.736	1.7696
	60	8.54	1.6884
	61	8.316	1.6156
	62	8.12	1.5456
	63	7.924	1.4812
	64	7.728	1.4196
	65	7.532	1.3608
	66	7.336	1.3076
	67	7.14	1.2572
	68	6.944	1.2068
	69	6.776	1.162
	70	6.58	1.12
	71	6.412	1.078
	72	6.244	1.0388
	73	6.076	1.0024
	74	5.908	0.9688
	75	5.768	0.9352
	76	5.6	0.9044
	77	5.46	0.8764
	78	5.32	0.8484
	79	5.18	0.8204
	80	5.04	0.7952
	81	4.9	0.77
	82	4.788	0.7476
	83	4.676	0.7252
	84	4.536	0.7056
	85	4.424	0.686
	86	4.312	0.6664
	87	4.228	0.6468
	88	4.116	0.63
	89	4.032	0.6132
	90	3.948	0.5964
	91	3.864	0.5824
	92	3.78	0.5684
	93	3.696	0.5544
	94	3.612	0.5404
	95	3.556	0.5264
	96	3.472	0.5152
	97	3.416	0.504
	98	3.36	0.49
	99	3.304	0.4816
	100	3.248	0.4704
	101	3.192	0.4592
	102	3.136	0.4508
	103	3.08	0.4396
	104	3.052	0.4312
	105	2.996	0.4228
	106	2.968	0.4144
	107	2.94	0.406
	108	2.912	0.3976
	109	2.856	0.392
	110	2.828	0.3836
	111	2.828	0.378
	112	2.7916	0.3696
	113	2.7664	0.364
	114	2.7468	0.3584
	115	2.73	0.3528
	116	2.7132	0.3472
	117	2.6964	0.3416
	118	2.6824	0.336
	119	2.6712	0.3304
	120	2.6628	0.3248
	121	2.6544	0.3192
	122	2.646	0.3164
	123	2.6404	0.3108
	124	2.6348	0.308
	125	2.632	0.3024
	126	2.6292	0.2996
	127	2.6292	0.294
	128	2.6292	0.2912
	129	2.632	0.2884
	130	2.632	0.2828
	131	2.6376	0.28
	132	2.6404	0.27692
	133	2.646	0.27384
	134	2.6516	0.27076
	135	2.6572	0.26768
	136	2.6656	0.26488
	137	2.674	0.26208
	138	2.6824	0.25956
	139	2.6908	0.25704
	140	2.6992	0.25452
	141	2.7104	0.25228
	142	2.7216	0.24976
	143	2.7328	0.24752
	144	2.744	0.24556
	145	2.7552	0.24332
	146	2.7664	0.24136
	147	2.7776	0.23968
	148	2.7916	0.23772
	149	2.8	0.23604
	150	2.828	0.23436
	151	2.828	0.23268
	152	2.828	0.23128
	153	2.856	0.2296
	154	2.856	0.2282
	155	2.884	0.22708
	156	2.884	0.22568
	157	2.912	0.22456
	158	2.912	0.22316
	159	2.912	0.22204
	160	2.94	0.2212
	161	2.94	0.22008
	162	2.968	0.21924
	163	2.968	0.2184
	164	2.968	0.21756
	165	2.996	0.21672
	166	2.996	0.21588
	167	2.996	0.21532
	168	3.024	0.21476
	169	3.024	0.2142
	170	3.024	0.21364
	171	3.024	0.21308
	172	3.024	0.2128
	173	3.052	0.21252
	174	3.052	0.21196
	175	3.052	0.21168
	176	3.052	0.21168
	177	3.052	0.2114
	178	3.052	0.2114
	179	3.052	0.21112
	180	3.052	0.21112
E=3 eV	0	12.124	327600000
	1	12.348	7084
	2	12.6	1772.4
	3	12.824	786.8
	4	13.048	442.4
	5	13.272	282.8
	6	13.496	197.12
	7	13.692	144.76
	8	13.916	110.88
	9	14.112	87.64
	10	14.28	71.12
	11	14.448	58.8
	12	14.616	49.28
	13	14.784	42
	14	14.896	36.4
	15	15.036	31.64
	16	15.12	27.86
	17	15.204	24.724
	18	15.288	22.064
	19	15.344	19.824
	20	15.372	17.892
	21	15.372	16.268
	22	15.372	14.84
	23	15.344	13.58
	24	15.288	12.488
	25	15.232	11.536
	26	15.176	10.668
	27	15.064	9.912
	28	14.952	9.212
	29	14.812	8.624
	30	14.672	8.064
	31	14.504	7.364
	32	14.336	6.72
	33	14.168	6.132
	34	13.944	5.628
	35	13.748	5.18
	36	13.524	4.76
	37	13.272	4.396
	38	13.048	4.088
	39	12.796	3.78
	40	12.516	3.528
	41	12.264	3.276
	42	11.984	3.052
	43	11.704	2.856
	44	11.424	2.6796
	45	11.144	2.5116
	46	10.864	2.3604
	47	10.584	2.2204
	48	10.304	2.0916
	49	10.024	1.974
	50	9.744	1.8648
	51	9.464	1.764
	52	9.184	1.6716
	53	8.932	1.5848
	54	8.652	1.5036
	55	8.4	1.4308
	56	8.12	1.3608
	57	7.868	1.2964
	58	7.644	1.2348
	59	7.392	1.1788
	60	7.168	1.1256
	61	6.916	1.078
	62	6.72	1.0304
	63	6.496	0.9884
	64	6.272	0.9464
	65	6.076	0.9072
	66	5.88	0.8708
	67	5.712	0.8372
	68	5.516	0.8064
	69	5.348	0.7756
	70	5.18	0.7448
	71	5.04	0.7196
	72	4.872	0.6944
	73	4.732	0.6692
	74	4.592	0.6468
	75	4.48	0.6244
	76	4.34	0.602
	77	4.228	0.5824
	78	4.116	0.5656
	79	4.004	0.546
	80	3.892	0.5292
	81	3.78	0.5152
	82	3.696	0.4984
	83	3.612	0.4844
	84	3.528	0.4704
	85	3.444	0.4564
	86	3.36	0.4452
	87	3.276	0.4312
	88	3.22	0.42
	89	3.136	0.4088
	90	3.08	0.3976
	91	3.024	0.3892
	92	2.968	0.378
	93	2.912	0.3696
	94	2.856	0.3612
	95	2.8	0.35
	96	2.7496	0.3444
	97	2.7048	0.336
	98	2.66	0.3276
	99	2.618	0.3192
	100	2.5788	0.3136
	101	2.5424	0.3052
	102	2.506	0.2996
	103	2.4724	0.294
	104	2.4388	0.2884
	105	2.408	0.2828
	106	2.38	0.27636
	107	2.3548	0.27104
	108	2.3296	0.266
	109	2.3044	0.26096
	110	2.282	0.2562
	111	2.2624	0.25144
	112	2.2456	0.24696
	113	2.2288	0.24276
	114	2.212	0.23856
	115	2.198	0.23464
	116	2.1868	0.23072
	117	2.1756	0.22708
	118	2.1672	0.22344
	119	2.1588	0.22008
	120	2.1532	0.21672
	121	2.1504	0.21364
	122	2.1476	0.21056
	123	2.1448	0.20748
	124	2.1448	0.20468
	125	2.1476	0.20188
	126	2.1504	0.19908
	127	2.1532	0.19656
	128	2.1588	0.19404
	129	2.1672	0.19152
	130	2.1728	0.189
	131	2.184	0.18676
	132	2.1924	0.1848
	133	2.2036	0.18256
	134	2.2176	0.1806
	135	2.2316	0.17864
	136	2.2456	0.17668
	137	2.2596	0.17472
	138	2.2764	0.17304
	139	2.2932	0.17136
	140	2.31	0.16968
	141	2.3296	0.168
	142	2.3492	0.1666
	143	2.3688	0.1652
	144	2.3884	0.1638
	145	2.408	0.1624
	146	2.4276	0.161
	147	2.45	0.1596
	148	2.4724	0.15848
	149	2.492	0.15736
	150	2.5144	0.15624
	151	2.534	0.15512
	152	2.5564	0.154
	153	2.5788	0.15316
	154	2.5984	0.15232
	155	2.6208	0.1512
	156	2.6404	0.15036
	157	2.6628	0.14952
	158	2.6824	0.14896
	159	2.6992	0.14812
	160	2.7188	0.14728
	161	2.7384	0.14672
	162	2.7552	0.14616
	163	2.772	0.1456
	164	2.7888	0.14504
	165	2.8	0.14448
	166	2.828	0.14392
	167	2.828	0.14364
	168	2.856	0.14308
	169	2.856	0.1428
	170	2.884	0.14252
	171	2.884	0.14224
	172	2.884	0.14196
	173	2.912	0.14168
	174	2.912	0.1414
	175	2.912	0.14112
	176	2.912	0.14112
	177	2.912	0.14084
	178	2.912	0.14084
	179	2.912	0.14084
	180	2.912	0.14084
E=4 eV	0	15.176	436800000
	1	15.344	5320
	2	15.54	1330
	3	15.736	590.8
	4	15.904	333.2
	5	16.072	212.8
	6	16.268	147.84
	7	16.436	108.64
	8	16.576	83.16
	9	16.744	65.8
	10	16.856	53.2
	11	16.968	43.96
	12	17.08	36.96
	13	17.164	31.64
	14	17.22	27.272
	15	17.248	23.772
	16	17.276	20.916
	17	17.276	18.536
	18	17.248	16.548
	19	17.22	14.868
	20	17.136	13.44
	21	17.052	12.18
	22	16.94	11.116
	23	16.8	10.192
	24	16.632	9.38
	25	16.464	8.652
	26	16.268	8.008
	27	16.044	7.42
	28	15.792	6.916
	29	15.54	6.468
	30	15.288	6.048
	31	15.008	5.544
	32	14.7	5.04
	33	14.392	4.62
	34	14.084	4.228
	35	13.748	3.892
	36	13.412	3.584
	37	13.076	3.304
	38	12.712	3.052
	39	12.376	2.828
	40	12.04	2.6404
	41	11.676	2.4584
	42	11.34	2.2932
	43	10.976	2.1448
	44	10.64	2.0076
	45	10.304	1.8844
	46	9.968	1.7696
	47	9.632	1.666
	48	9.296	1.568
	49	8.988	1.4812
	50	8.68	1.4
	51	8.372	1.3244
	52	8.092	1.2544
	53	7.812	1.19
	54	7.532	1.1284
	55	7.28	1.0724
	56	7.028	1.0192
	57	6.776	0.9716
	58	6.552	0.9268
	59	6.328	0.8848
	60	6.104	0.8456
	61	5.908	0.8064
	62	5.712	0.7728
	63	5.544	0.7392
	64	5.348	0.7084
	65	5.18	0.6804
	66	5.04	0.6524
	67	4.872	0.6272
	68	4.732	0.6048
	69	4.62	0.5824
	70	4.48	0.56
	71	4.368	0.5404
	72	4.256	0.5208
	73	4.144	0.5012
	74	4.032	0.4844
	75	3.948	0.4676
	76	3.836	0.4536
	77	3.752	0.4368
	78	3.668	0.4228
	79	3.584	0.4116
	80	3.5	0.3976
	81	3.416	0.3864
	82	3.36	0.3752
	83	3.276	0.364
	84	3.22	0.3528
	85	3.136	0.3416
	86	3.08	0.3332
	87	3.024	0.3248
	88	2.968	0.3164
	89	2.884	0.308
	90	2.828	0.2996
	91	2.7832	0.2912
	92	2.7272	0.2828
	93	2.674	0.27664
	94	2.6208	0.26992
	95	2.5704	0.26348
	96	2.52	0.25732
	97	2.4724	0.25144
	98	2.4276	0.24556
	99	2.3828	0.24024
	100	2.338	0.23492
	101	2.2988	0.22988
	102	2.2568	0.22512
	103	2.2204	0.22036
	104	2.184	0.21588
	105	2.1504	0.2114
	106	2.1168	0.2072
	107	2.086	0.20328
	108	2.058	0.19936
	109	2.03	0.19572
	110	2.0048	0.19208
	111	1.9824	0.18872
	112	1.9628	0.18536
	113	1.946	0.182
	114	1.9292	0.17892
	115	1.9152	0.17612
	116	1.904	0.17304
	117	1.8928	0.17024
	118	1.8844	0.16772
	119	1.8788	0.1652
	120	1.876	0.16268
	121	1.876	0.16016
	122	1.876	0.15792
	123	1.8788	0.15568
	124	1.8844	0.15344
	125	1.89	0.1512
	126	1.8984	0.14924
	127	1.9096	0.14728
	128	1.9208	0.14532
	129	1.9348	0.14364
	130	1.9488	0.14196
	131	1.9656	0.14028
	132	1.9852	0.1386
	133	2.0048	0.13692
	134	2.0244	0.13552
	135	2.0468	0.13384
	136	2.072	0.13244
	137	2.0944	0.13104
	138	2.1196	0.12964
	139	2.1476	0.12852
	140	2.1728	0.1274
	141	2.2008	0.126
	142	2.2288	0.12488
	143	2.2596	0.12376
	144	2.2876	0.12264
	145	2.3184	0.1218
	146	2.3492	0.12068
	147	2.3772	0.11984
	148	2.408	0.119
	149	2.4388	0.11788
	150	2.4696	0.11704
	151	2.5004	0.11648
	152	2.5284	0.11564
	153	2.5592	0.1148
	154	2.5872	0.11424
	155	2.6152	0.1134
	156	2.6432	0.11284
	157	2.6712	0.11228
	158	2.6992	0.11172
	159	2.7244	0.11116
	160	2.7496	0.1106
	161	2.7748	0.11004
	162	2.7972	0.10948
	163	2.828	0.1092
	164	2.856	0.10864
	165	2.856	0.10836
	166	2.884	0.10808
	167	2.912	0.1078
	168	2.912	0.10724
	169	2.94	0.10696
	170	2.94	0.10668
	171	2.968	0.10668
	172	2.968	0.1064
	173	2.996	0.10612
	174	2.996	0.10612
	175	2.996	0.10584
	176	3.024	0.10584
	177	3.024	0.10584
	178	3.024	0.10556
	179	3.024	0.10556
	180	3.024	0.10556
E=5 eV	0	18.396	546000000
	1	18.48	4256
	2	18.592	1064
	3	18.704	473.2
	4	18.788	266
	5	18.9	170.24
	6	18.984	118.16
	7	19.068	86.8
	8	19.124	66.64
	9	19.18	52.64
	10	19.208	42.56
	11	19.236	35.28
	12	19.236	29.68
	13	19.208	25.284
	14	19.152	21.812
	15	19.068	19.012
	16	18.984	16.716
	17	18.872	14.84
	18	18.732	13.244
	19	18.564	11.9
	20	18.368	10.752
	21	18.144	9.744
	22	17.892	8.904
	23	17.64	8.148
	24	17.332	7.504
	25	17.024	6.916
	26	16.716	6.412
	27	16.38	5.936
	28	16.016	5.544
	29	15.624	5.18
	30	15.26	4.844
	31	14.868	4.424
	32	14.448	4.032
	33	14.056	3.696
	34	13.636	3.388
	35	13.216	3.108
	36	12.796	2.856
	37	12.376	2.6432
	38	11.956	2.4472
	39	11.564	2.2708
	40	11.144	2.1112
	41	10.752	1.9656
	42	10.36	1.8368
	43	9.968	1.7164
	44	9.604	1.6072
	45	9.24	1.5064
	46	8.904	1.4168
	47	8.568	1.3328
	48	8.232	1.2544
	49	7.924	1.1844
	50	7.644	1.12
	51	7.364	1.0584
	52	7.084	1.0024
	53	6.832	0.952
	54	6.608	0.9016
	55	6.384	0.8568
	56	6.16	0.8176
	57	5.964	0.7784
	58	5.768	0.742
	59	5.572	0.7084
	60	5.404	0.6748
	61	5.264	0.6468
	62	5.096	0.6188
	63	4.956	0.5936
	64	4.844	0.5684
	65	4.704	0.546
	66	4.592	0.5236
	67	4.48	0.5012
	68	4.368	0.4844
	69	4.284	0.4648
	70	4.172	0.448
	71	4.088	0.4312
	72	4.004	0.4172
	73	3.92	0.4004
	74	3.836	0.3864
	75	3.752	0.3752
	76	3.668	0.3612
	77	3.612	0.35
	78	3.528	0.3388
	79	3.444	0.3276
	80	3.388	0.3192
	81	3.304	0.308
	82	3.22	0.2996
	83	3.164	0.2912
	84	3.08	0.2828
	85	3.024	0.27384
	86	2.94	0.26628
	87	2.884	0.259
	88	2.828	0.252
	89	2.7524	0.24528
	90	2.6852	0.23884
	91	2.6208	0.23268
	92	2.5592	0.22708
	93	2.4976	0.2212
	94	2.436	0.21588
	95	2.3772	0.21084
	96	2.3212	0.2058
	97	2.2652	0.20104
	98	2.212	0.19656
	99	2.1616	0.19208
	100	2.1112	0.18788
	101	2.0664	0.18396
	102	2.0216	0.18004
	103	1.9796	0.17612
	104	1.9404	0.17276
	105	1.9012	0.16912
	106	1.8676	0.16576
	107	1.8368	0.16268
	108	1.8088	0.1596
	109	1.7808	0.15652
	110	1.7584	0.15372
	111	1.736	0.15092
	112	1.7192	0.14812
	113	1.7024	0.1456
	114	1.6912	0.14308
	115	1.68	0.14084
	116	1.6744	0.1386
	117	1.6688	0.13636
	118	1.666	0.13412
	119	1.666	0.13216
	120	1.6688	0.1302
	121	1.6744	0.12824
	122	1.68	0.12628
	123	1.6912	0.1246
	124	1.7024	0.12264
	125	1.7136	0.12096
	126	1.7304	0.11956
	127	1.7472	0.11788
	128	1.7668	0.11648
	129	1.7864	0.1148
	130	1.8088	0.1134
	131	1.8312	0.112
	132	1.8564	0.11088
	133	1.8844	0.10948
	134	1.9124	0.10836
	135	1.9404	0.10724
	136	1.9684	0.10612
	137	1.9992	0.105
	138	2.03	0.10388
	139	2.0636	0.10276
	140	2.0972	0.10192
	141	2.1308	0.1008
	142	2.1644	0.09996
	143	2.198	0.09912
	144	2.2316	0.09828
	145	2.268	0.09744
	146	2.3016	0.0966
	147	2.338	0.09576
	148	2.3716	0.0952
	149	2.4052	0.09436
	150	2.4416	0.0938
	151	2.4752	0.09296
	152	2.5088	0.0924
	153	2.5424	0.09184
	154	2.576	0.09128
	155	2.6096	0.09072
	156	2.6404	0.09016
	157	2.6712	0.08988
	158	2.702	0.08932
	159	2.7328	0.08876
	160	2.7608	0.08848
	161	2.786	0.08792
	162	2.8	0.08764
	163	2.828	0.08736
	164	2.856	0.08708
	165	2.884	0.0868
	166	2.912	0.08652
	167	2.94	0.08624
	168	2.94	0.08596
	169	2.968	0.08568
	170	2.996	0.0854
	171	2.996	0.0854
	172	3.024	0.08512
	173	3.024	0.08484
	174	3.024	0.08484
	175	3.052	0.08484
	176	3.052	0.08456
	177	3.052	0.08456
	178	3.052	0.08456
	179	3.052	0.08456
	180	3.052	0.08456
E=7 eV	0	25.676	767200000
	1	25.48	3052
	2	25.284	758.8
	3	25.116	338.8
	4	24.92	189.84
	5	24.724	121.52
	6	24.528	84.56
	7	24.332	62.16
	8	24.108	47.6
	9	23.856	37.52
	10	23.604	30.52
	11	23.324	25.2
	12	23.044	21.168
	13	22.708	18.06
	14	22.372	15.568
	15	22.008	13.58
	16	21.616	11.956
	17	21.196	10.584
	18	20.748	9.464
	19	20.3	8.484
	20	19.796	7.672
	21	19.292	6.972
	22	18.788	6.356
	23	18.228	5.824
	24	17.696	5.348
	25	17.136	4.928
	26	16.576	4.564
	27	15.988	4.256
	28	15.428	3.948
	29	14.84	3.696
	30	14.28	3.444
	31	13.72	3.164
	32	13.16	2.884
	33	12.6	2.6348
	34	12.068	2.4136
	35	11.564	2.2204
	36	11.06	2.044
	37	10.584	1.89
	38	10.108	1.75
	39	9.66	1.6212
	40	9.24	1.5092
	41	8.848	1.4056
	42	8.456	1.3104
	43	8.092	1.2264
	44	7.756	1.148
	45	7.448	1.078
	46	7.168	1.0108
	47	6.888	0.952
	48	6.636	0.896
	49	6.412	0.8456
	50	6.216	0.8008
	51	6.02	0.756
	52	5.824	0.7168
	53	5.656	0.6804
	54	5.516	0.644
	55	5.376	0.6132
	56	5.264	0.5824
	57	5.124	0.5544
	58	5.012	0.5292
	59	4.928	0.504
	60	4.816	0.4816
	61	4.732	0.462
	62	4.648	0.4424
	63	4.564	0.4228
	64	4.48	0.406
	65	4.396	0.3892
	66	4.312	0.3724
	67	4.228	0.3584
	68	4.144	0.3444
	69	4.06	0.3332
	70	3.976	0.3192
	71	3.892	0.308
	72	3.808	0.2968
	73	3.724	0.2856
	74	3.64	0.27692
	75	3.528	0.2674
	76	3.444	0.25844
	77	3.36	0.25004
	78	3.276	0.2422
	79	3.192	0.23436
	80	3.08	0.22708
	81	2.996	0.22036
	82	2.912	0.21364
	83	2.828	0.20748
	84	2.7384	0.20132
	85	2.6544	0.19572
	86	2.5704	0.19012
	87	2.4892	0.18508
	88	2.4108	0.18004
	89	2.3352	0.17528
	90	2.2624	0.1708
	91	2.1924	0.16632
	92	2.1252	0.16212
	93	2.0608	0.1582
	94	2.002	0.15428
	95	1.9432	0.15064
	96	1.89	0.147
	97	1.8396	0.14364
	98	1.792	0.14028
	99	1.7472	0.1372
	100	1.7052	0.13412
	101	1.6688	0.13132
	102	1.6352	0.12852
	103	1.6044	0.126
	104	1.5764	0.1232
	105	1.5512	0.12096
	106	1.5288	0.11844
	107	1.5092	0.1162
	108	1.4952	0.11396
	109	1.4812	0.11172
	110	1.47	0.10976
	111	1.4616	0.1078
	112	1.456	0.10584
	113	1.4532	0.10416
	114	1.4504	0.1022
	115	1.4532	0.10052
	116	1.456	0.09884
	117	1.4616	0.09744
	118	1.4672	0.09576
	119	1.4784	0.09436
	120	1.4896	0.09296
	121	1.5008	0.09156
	122	1.5176	0.09016
	123	1.5344	0.08904
	124	1.554	0.08764
	125	1.5736	0.08652
	126	1.596	0.0854
	127	1.6212	0.08428
	128	1.6464	0.08316
	129	1.6716	0.08204
	130	1.7024	0.08092
	131	1.7332	0.08008
	132	1.764	0.07924
	133	1.7976	0.07812
	134	1.8312	0.07728
	135	1.8676	0.07644
	136	1.904	0.0756
	137	1.9432	0.07504
	138	1.9824	0.0742
	139	2.0244	0.07336
	140	2.0664	0.0728
	141	2.1084	0.07196
	142	2.1504	0.0714
	143	2.1952	0.07084
	144	2.24	0.07028
	145	2.2848	0.06944
	146	2.3324	0.06888
	147	2.3772	0.06832
	148	2.422	0.06804
	149	2.4696	0.06748
	150	2.5172	0.06692
	151	2.562	0.06636
	152	2.6096	0.06608
	153	2.6544	0.06552
	154	2.6992	0.06524
	155	2.744	0.06496
	156	2.7888	0.0644
	157	2.828	0.06412
	158	2.884	0.06384
	159	2.912	0.06356
	160	2.968	0.06328
	161	2.996	0.063
	162	3.024	0.06272
	163	3.08	0.06244
	164	3.108	0.06216
	165	3.136	0.06188
	166	3.164	0.0616
	167	3.192	0.0616
	168	3.22	0.06132
	169	3.248	0.06132
	170	3.276	0.06104
	171	3.304	0.06104
	172	3.332	0.06076
	173	3.332	0.06076
	174	3.36	0.06048
	175	3.36	0.06048
	176	3.388	0.06048
	177	3.388	0.06048
	178	3.388	0.06048
	179	3.388	0.06048
	180	3.388	0.06048
E=10 eV	0	38.64	1094800000
	1	37.8	2128
	2	36.96	532
	3	36.12	236.32
	4	35.28	133
	5	34.44	85.12
	6	33.6	59.08
	7	32.48	43.4
	8	31.64	33.32
	9	30.8	26.32
	10	29.96	21.308
	11	29.12	17.64
	12	28	14.812
	13	27.16	12.628
	14	26.236	10.892
	15	25.284	9.52
	16	24.332	8.372
	17	23.352	7.42
	18	22.4	6.608
	19	21.448	5.936
	20	20.496	5.376
	21	19.572	4.872
	22	18.62	4.452
	23	17.724	4.088
	24	16.828	3.752
	25	15.96	3.444
	26	15.12	3.192
	27	14.28	2.968
	28	13.496	2.7664
	29	12.768	2.5844
	30	12.04	2.4192
	31	11.368	2.212
	32	10.752	2.016
	33	10.164	1.8424
	34	9.604	1.6912
	35	9.072	1.554
	36	8.624	1.4308
	37	8.176	1.3216
	38	7.784	1.2236
	39	7.42	1.1368
	40	7.084	1.0556
	41	6.804	0.9828
	42	6.552	0.9184
	43	6.328	0.8568
	44	6.104	0.8036
	45	5.936	0.7532
	46	5.768	0.7084
	47	5.628	0.6664
	48	5.488	0.6272
	49	5.376	0.5936
	50	5.264	0.56
	51	5.18	0.5292
	52	5.068	0.5012
	53	4.984	0.476
	54	4.9	0.4508
	55	4.816	0.4284
	56	4.732	0.4088
	57	4.648	0.3892
	58	4.564	0.3696
	59	4.48	0.3528
	60	4.396	0.3388
	61	4.312	0.322
	62	4.2	0.308
	63	4.116	0.2968
	64	4.004	0.2828
	65	3.92	0.27244
	66	3.808	0.26152
	67	3.696	0.25116
	68	3.584	0.24164
	69	3.5	0.2324
	70	3.388	0.22372
	71	3.276	0.2156
	72	3.192	0.20804
	73	3.08	0.20076
	74	2.996	0.19376
	75	2.884	0.18732
	76	2.8	0.18088
	77	2.7132	0.175
	78	2.632	0.1694
	79	2.5508	0.16408
	80	2.478	0.15904
	81	2.408	0.15428
	82	2.3408	0.14952
	83	2.2792	0.14532
	84	2.2204	0.14112
	85	2.1672	0.13692
	86	2.1168	0.13328
	87	2.0692	0.12964
	88	2.0244	0.126
	89	1.9824	0.12264
	90	1.9432	0.11956
	91	1.9068	0.11648
	92	1.8704	0.1134
	93	1.8368	0.1106
	94	1.806	0.10808
	95	1.778	0.10528
	96	1.75	0.10304
	97	1.722	0.10052
	98	1.694	0.09828
	99	1.6716	0.09604
	100	1.6464	0.09408
	101	1.624	0.09184
	102	1.6016	0.08988
	103	1.5792	0.0882
	104	1.5596	0.08624
	105	1.54	0.08456
	106	1.5232	0.08288
	107	1.5064	0.0812
	108	1.4924	0.0798
	109	1.4784	0.0784
	110	1.4672	0.07672
	111	1.4588	0.0756
	112	1.4504	0.0742
	113	1.4448	0.0728
	114	1.442	0.07168
	115	1.442	0.07028
	116	1.4448	0.06916
	117	1.4504	0.06804
	118	1.4588	0.0672
	119	1.47	0.06608
	120	1.484	0.06496
	121	1.5008	0.06412
	122	1.5204	0.063
	123	1.5456	0.06216
	124	1.5736	0.06132
	125	1.6016	0.06048
	126	1.6352	0.05964
	127	1.6716	0.0588
	128	1.7136	0.05824
	129	1.7556	0.0574
	130	1.8004	0.05684
	131	1.8508	0.056
	132	1.9012	0.05544
	133	1.9544	0.05488
	134	2.0104	0.05404
	135	2.072	0.05348
	136	2.1336	0.05292
	137	2.1952	0.05236
	138	2.2624	0.0518
	139	2.3296	0.05152
	140	2.3968	0.05096
	141	2.4668	0.0504
	142	2.5396	0.04984
	143	2.6124	0.04956
	144	2.6852	0.049
	145	2.758	0.04872
	146	2.828	0.04816
	147	2.912	0.04788
	148	2.996	0.0476
	149	3.052	0.04732
	150	3.136	0.04676
	151	3.22	0.04648
	152	3.276	0.0462
	153	3.36	0.04592
	154	3.416	0.04564
	155	3.5	0.04536
	156	3.556	0.04508
	157	3.64	0.0448
	158	3.696	0.04452
	159	3.752	0.04452
	160	3.836	0.04424
	161	3.892	0.04396
	162	3.948	0.04396
	163	4.004	0.04368
	164	4.06	0.0434
	165	4.088	0.0434
	166	4.144	0.04312
	167	4.2	0.04312
	168	4.228	0.04284
	169	4.284	0.04284
	170	4.312	0.04284
	171	4.34	0.04256
	172	4.368	0.04256
	173	4.396	0.04256
	174	4.424	0.04228
	175	4.424	0.04228
	176	4.452	0.04228
	177	4.48	0.04228
	178	4.48	0.04228
	179	4.48	0.04228
	180	4.48	0.04228
E=15 eV	0	65.52	1640800000
	1	63.28	1416.8
	2	61.04	355.6
	3	58.8	157.64
	4	56.28	88.76
	5	53.76	56.84
	6	51.24	39.48
	7	48.72	28.84
	8	46.48	22.204
	9	43.96	17.528
	10	41.44	14.224
	11	38.92	11.76
	12	36.4	9.884
	13	34.16	8.428
	14	31.92	7.28
	15	29.68	6.328
	16	27.636	5.572
	17	25.62	4.956
	18	23.716	4.424
	19	21.868	3.976
	20	20.16	3.584
	21	18.536	3.248
	22	17.052	2.968
	23	15.652	2.716
	24	14.364	2.4976
	25	13.188	2.3044
	26	12.096	2.1336
	27	11.144	1.9824
	28	10.248	1.8452
	29	9.464	1.722
	30	8.792	1.6128
	31	8.176	1.4756
	32	7.644	1.344
	33	7.168	1.2292
	34	6.776	1.1256
	35	6.412	1.036
	36	6.132	0.9548
	37	5.88	0.882
	38	5.656	0.8148
	39	5.488	0.756
	40	5.32	0.7028
	41	5.18	0.6552
	42	5.068	0.6132
	43	4.956	0.5712
	44	4.844	0.5348
	45	4.76	0.5012
	46	4.676	0.4732
	47	4.564	0.4452
	48	4.48	0.4172
	49	4.368	0.3948
	50	4.284	0.3724
	51	4.172	0.3528
	52	4.06	0.3332
	53	3.948	0.3164
	54	3.836	0.2996
	55	3.724	0.2856
	56	3.64	0.27216
	57	3.528	0.25928
	58	3.416	0.24724
	59	3.304	0.23576
	60	3.22	0.2254
	61	3.136	0.21532
	62	3.052	0.20608
	63	2.968	0.1974
	64	2.912	0.18928
	65	2.828	0.18144
	66	2.7888	0.17444
	67	2.7412	0.16744
	68	2.6992	0.161
	69	2.6656	0.15484
	70	2.6376	0.14924
	71	2.6124	0.14392
	72	2.5928	0.1386
	73	2.576	0.13384
	74	2.562	0.12908
	75	2.548	0.12488
	76	2.534	0.12068
	77	2.52	0.11676
	78	2.506	0.11312
	79	2.4892	0.10948
	80	2.4696	0.10612
	81	2.4472	0.10276
	82	2.422	0.09968
	83	2.394	0.09688
	84	2.3604	0.09408
	85	2.324	0.09128
	86	2.282	0.08876
	87	2.24	0.08624
	88	2.1924	0.084
	89	2.142	0.08176
	90	2.0888	0.07952
	91	2.0356	0.07756
	92	1.9796	0.0756
	93	1.9208	0.07364
	94	1.862	0.07196
	95	1.8032	0.07028
	96	1.7472	0.0686
	97	1.6884	0.06692
	98	1.6352	0.06552
	99	1.5792	0.06412
	100	1.5288	0.06272
	101	1.4812	0.06132
	102	1.4336	0.05992
	103	1.3916	0.0588
	104	1.3552	0.05768
	105	1.3188	0.05628
	106	1.2908	0.05516
	107	1.2628	0.05432
	108	1.2432	0.0532
	109	1.2264	0.05208
	110	1.2124	0.05124
	111	1.2068	0.0504
	112	1.204	0.04928
	113	1.204	0.04844
	114	1.2096	0.0476
	115	1.2208	0.04704
	116	1.2376	0.0462
	117	1.2572	0.04536
	118	1.2796	0.0448
	119	1.3076	0.04396
	120	1.3384	0.0434
	121	1.372	0.04284
	122	1.4112	0.042
	123	1.4532	0.04144
	124	1.498	0.04088
	125	1.5456	0.04032
	126	1.5988	0.03976
	127	1.652	0.0392
	128	1.708	0.03892
	129	1.7668	0.03836
	130	1.8284	0.0378
	131	1.89	0.03724
	132	1.9572	0.03696
	133	2.0244	0.0364
	134	2.0916	0.03612
	135	2.1616	0.03584
	136	2.2316	0.03528
	137	2.3044	0.035
	138	2.3772	0.03472
	139	2.4528	0.03416
	140	2.5284	0.03388
	141	2.604	0.0336
	142	2.6796	0.03332
	143	2.7552	0.03304
	144	2.828	0.03276
	145	2.912	0.03248
	146	2.996	0.0322
	147	3.052	0.03192
	148	3.136	0.03164
	149	3.22	0.03136
	150	3.276	0.03136
	151	3.36	0.03108
	152	3.444	0.0308
	153	3.5	0.03052
	154	3.584	0.03052
	155	3.64	0.03024
	156	3.696	0.02996
	157	3.78	0.02996
	158	3.836	0.02968
	159	3.892	0.02968
	160	3.948	0.0294
	161	4.004	0.0294
	162	4.06	0.02912
	163	4.116	0.02912
	164	4.172	0.02912
	165	4.228	0.02884
	166	4.256	0.02884
	167	4.312	0.02884
	168	4.34	0.02856
	169	4.396	0.02856
	170	4.424	0.02856
	171	4.452	0.02856
	172	4.48	0.02828
	173	4.508	0.02828
	174	4.508	0.02828
	175	4.536	0.02828
	176	4.564	0.02828
	177	4.564	0.02828
	178	4.564	0.02828
	179	4.592	0.02828
	180	4.592	0.02828
E= 20 eV	0	94.64	2189600000
	1	91	1064
	2	87.08	266
	3	83.16	118.16
	4	78.96	66.36
	5	74.48	42.56
	6	70	29.68
	7	65.52	21.728
	8	61.04	16.632
	9	56.56	13.16
	10	52.36	10.668
	11	48.16	8.82
	12	43.96	7.42
	13	40.04	6.328
	14	36.4	5.46
	15	33.04	4.76
	16	29.68	4.172
	17	26.712	3.696
	18	23.968	3.304
	19	21.42	2.968
	20	19.152	2.6852
	21	17.08	2.4388
	22	15.232	2.2232
	23	13.608	2.0384
	24	12.18	1.8732
	25	10.92	1.7276
	26	9.856	1.6016
	27	8.932	1.4868
	28	8.12	1.3832
	29	7.448	1.2908
	30	6.888	1.2096
	31	6.44	1.106
	32	6.048	1.008
	33	5.712	0.9212
	34	5.432	0.8456
	35	5.208	0.7756
	36	4.984	0.7168
	37	4.816	0.6608
	38	4.676	0.6132
	39	4.508	0.5684
	40	4.368	0.5292
	41	4.256	0.4928
	42	4.116	0.4592
	43	3.976	0.4284
	44	3.836	0.4004
	45	3.724	0.378
	46	3.584	0.3528
	47	3.444	0.3332
	48	3.332	0.3136
	49	3.22	0.2968
	50	3.108	0.27972
	51	2.996	0.2646
	52	2.912	0.2506
	53	2.828	0.23772
	54	2.744	0.22568
	55	2.6824	0.21448
	56	2.6348	0.20412
	57	2.6012	0.19432
	58	2.576	0.18536
	59	2.562	0.17696
	60	2.5592	0.16884
	61	2.5648	0.16156
	62	2.5732	0.15456
	63	2.59	0.14812
	64	2.6124	0.14196
	65	2.632	0.13608
	66	2.6544	0.13076
	67	2.674	0.12572
	68	2.688	0.12068
	69	2.702	0.1162
	70	2.7076	0.112
	71	2.7076	0.1078
	72	2.6992	0.10388
	73	2.6852	0.10024
	74	2.66	0.09688
	75	2.6292	0.09352
	76	2.59	0.09044
	77	2.5452	0.08764
	78	2.492	0.08484
	79	2.4332	0.08204
	80	2.3688	0.07952
	81	2.2988	0.077
	82	2.226	0.07476
	83	2.1504	0.07252
	84	2.072	0.07056
	85	1.9908	0.0686
	86	1.9124	0.06664
	87	1.834	0.06468
	88	1.7556	0.063
	89	1.6772	0.06132
	90	1.6044	0.05964
	91	1.5316	0.05824
	92	1.4644	0.05684
	93	1.4	0.05544
	94	1.3384	0.05404
	95	1.2824	0.05264
	96	1.2292	0.05152
	97	1.1788	0.0504
	98	1.134	0.049
	99	1.0948	0.04816
	100	1.0584	0.04704
	101	1.0248	0.04592
	102	0.9968	0.04508
	103	0.9744	0.04396
	104	0.9548	0.04312
	105	0.938	0.04228
	106	0.9268	0.04144
	107	0.9156	0.0406
	108	0.9128	0.03976
	109	0.91	0.0392
	110	0.91	0.03836
	111	0.9156	0.0378
	112	0.924	0.03696
	113	0.9352	0.0364
	114	0.9492	0.03584
	115	0.9688	0.03528
	116	0.9884	0.03472
	117	1.0108	0.03416
	118	1.0388	0.0336
	119	1.0668	0.03304
	120	1.0976	0.03248
	121	1.134	0.03192
	122	1.1704	0.03164
	123	1.2096	0.03108
	124	1.2516	0.0308
	125	1.2964	0.03024
	126	1.344	0.02996
	127	1.3944	0.0294
	128	1.4448	0.02912
	129	1.5008	0.02884
	130	1.5568	0.02828
	131	1.6128	0.028
	132	1.6744	0.027692
	133	1.736	0.027384
	134	1.8004	0.027076
	135	1.8648	0.026768
	136	1.932	0.026488
	137	1.9992	0.026208
	138	2.0692	0.025956
	139	2.142	0.025704
	140	2.212	0.025452
	141	2.2876	0.025228
	142	2.3604	0.024976
	143	2.436	0.024752
	144	2.5088	0.024556
	145	2.5872	0.024332
	146	2.6628	0.024136
	147	2.7384	0.023968
	148	2.828	0.023772
	149	2.884	0.023604
	150	2.968	0.023436
	151	3.052	0.023268
	152	3.136	0.023128
	153	3.192	0.02296
	154	3.276	0.02282
	155	3.332	0.022708
	156	3.416	0.022568
	157	3.5	0.022456
	158	3.556	0.022316
	159	3.612	0.022204
	160	3.696	0.02212
	161	3.752	0.022008
	162	3.808	0.021924
	163	3.864	0.02184
	164	3.92	0.021756
	165	3.976	0.021672
	166	4.032	0.021588
	167	4.088	0.021532
	168	4.116	0.021476
	169	4.172	0.02142
	170	4.2	0.021364
	171	4.256	0.021308
	172	4.284	0.02128
	173	4.312	0.021252
	174	4.34	0.021196
	175	4.34	0.021168
	176	4.368	0.021168
	177	4.396	0.02114
	178	4.396	0.02114
	179	4.396	0.021112
	180	4.396	0.021112
E=30 eV	0	146.16	3276000000
	1	140	708.4
	2	133	177.24
	3	125.44	78.68
	4	117.32	44.24
	5	108.92	28.28
	6	100.24	19.712
	7	91.56	14.476
	8	83.16	11.088
	9	74.76	8.764
	10	66.92	7.112
	11	59.36	5.88
	12	52.08	4.928
	13	45.64	4.2
	14	39.76	3.64
	15	34.44	3.164
	16	29.68	2.786
	17	25.424	2.4724
	18	21.784	2.2064
	19	18.676	1.9824
	20	16.016	1.7892
	21	13.804	1.6268
	22	11.956	1.484
	23	10.444	1.358
	24	9.24	1.2488
	25	8.232	1.1536
	26	7.42	1.0668
	27	6.748	0.9912
	28	6.216	0.9212
	29	5.768	0.8624
	30	5.376	0.8064
	31	5.04	0.7364
	32	4.76	0.672
	33	4.48	0.6132
	34	4.2	0.5628
	35	3.948	0.518
	36	3.724	0.476
	37	3.5	0.4396
	38	3.276	0.4088
	39	3.08	0.378
	40	2.884	0.3528
	41	2.7244	0.3276
	42	2.5816	0.3052
	43	2.464	0.2856
	44	2.366	0.26796
	45	2.296	0.25116
	46	2.2428	0.23604
	47	2.2148	0.22204
	48	2.2036	0.20916
	49	2.2092	0.1974
	50	2.226	0.18648
	51	2.254	0.1764
	52	2.2876	0.16716
	53	2.324	0.15848
	54	2.3604	0.15036
	55	2.394	0.14308
	56	2.422	0.13608
	57	2.4416	0.12964
	58	2.45	0.12348
	59	2.4528	0.11788
	60	2.4416	0.11256
	61	2.422	0.1078
	62	2.3912	0.10304
	63	2.3492	0.09884
	64	2.3016	0.09464
	65	2.2428	0.09072
	66	2.1784	0.08708
	67	2.1084	0.08372
	68	2.0356	0.08064
	69	1.96	0.07756
	70	1.8816	0.07448
	71	1.8032	0.07196
	72	1.7276	0.06944
	73	1.652	0.06692
	74	1.5792	0.06468
	75	1.5092	0.06244
	76	1.442	0.0602
	77	1.3776	0.05824
	78	1.316	0.05656
	79	1.26	0.0546
	80	1.204	0.05292
	81	1.1536	0.05152
	82	1.1032	0.04984
	83	1.0584	0.04844
	84	1.0136	0.04704
	85	0.9716	0.04564
	86	0.9324	0.04452
	87	0.8932	0.04312
	88	0.8568	0.042
	89	0.8204	0.04088
	90	0.7868	0.03976
	91	0.756	0.03892
	92	0.7252	0.0378
	93	0.6972	0.03696
	94	0.672	0.03612
	95	0.6468	0.035
	96	0.6216	0.03444
	97	0.602	0.0336
	98	0.5824	0.03276
	99	0.5656	0.03192
	100	0.5516	0.03136
	101	0.5376	0.03052
	102	0.5292	0.02996
	103	0.5208	0.0294
	104	0.5152	0.02884
	105	0.5124	0.02828
	106	0.5124	0.027636
	107	0.5152	0.027104
	108	0.5208	0.0266
	109	0.5292	0.026096
	110	0.5404	0.02562
	111	0.5544	0.025144
	112	0.5712	0.024696
	113	0.5908	0.024276
	114	0.616	0.023856
	115	0.6412	0.023464
	116	0.672	0.023072
	117	0.7056	0.022708
	118	0.742	0.022344
	119	0.7812	0.022008
	120	0.826	0.021672
	121	0.8736	0.021364
	122	0.924	0.021056
	123	0.9772	0.020748
	124	1.036	0.020468
	125	1.0976	0.020188
	126	1.162	0.019908
	127	1.2292	0.019656
	128	1.2992	0.019404
	129	1.3748	0.019152
	130	1.4504	0.0189
	131	1.5288	0.018676
	132	1.61	0.01848
	133	1.694	0.018256
	134	1.7808	0.01806
	135	1.8704	0.017864
	136	1.96	0.017668
	137	2.0496	0.017472
	138	2.142	0.017304
	139	2.2372	0.017136
	140	2.3296	0.016968
	141	2.4276	0.0168
	142	2.5228	0.01666
	143	2.618	0.01652
	144	2.7132	0.01638
	145	2.8	0.01624
	146	2.912	0.0161
	147	2.996	0.01596
	148	3.08	0.015848
	149	3.192	0.015736
	150	3.276	0.015624
	151	3.36	0.015512
	152	3.444	0.0154
	153	3.528	0.015316
	154	3.612	0.015232
	155	3.696	0.01512
	156	3.78	0.015036
	157	3.864	0.014952
	158	3.948	0.014896
	159	4.004	0.014812
	160	4.088	0.014728
	161	4.144	0.014672
	162	4.228	0.014616
	163	4.284	0.01456
	164	4.34	0.014504
	165	4.396	0.014448
	166	4.452	0.014392
	167	4.508	0.014364
	168	4.564	0.014308
	169	4.592	0.01428
	170	4.648	0.014252
	171	4.676	0.014224
	172	4.704	0.014196
	173	4.732	0.014168
	174	4.76	0.01414
	175	4.788	0.014112
	176	4.788	0.014112
	177	4.816	0.014084
	178	4.816	0.014084
	179	4.816	0.014084
	180	4.816	0.014084
E=40 eV	0	190.4	4368000000
	1	181.44	532
	2	171.08	133
	3	159.6	59.08
	4	147.56	33.32
	5	134.68	21.28
	6	121.8	14.784
	7	108.92	10.864
[truncated: 2,022 more rows]
[truncated: 6 more columns]
