# Supplementary material
Source: Royal Society of Chemistry journal article supplement (doi:10.1039/d6cp01244b)
Supplement: d6cp01244b2.xlsx [file d6cp01244b2.xlsx]

## Sheet: Sheet1
Ei	Elastic	Inelastic	Rotational	Total
1	87.92	0	341.6	428.4
1.5	79.24	0	238.84	319.2
2	73.08	0	184.8	257.88
3	67.2	0	128.8	196
4	63.84	0	99.4	163.24
5	61.32	0	81.48	142.8
7	57.12	0	60.2	117.32
10	54.32	0.09408	43.4	98
15	50.96	2.1028	30.24	83.44
20	47.6	5.768	23.184	76.44
30	43.4	11.34	15.988	70.84
40	39.48	13.664	12.292	65.52
50	36.12	14.532	10.024	60.76
70	31.64	14.952	7.364	54.04
100	27.244	14.56	5.292	47.04
150	22.344	13.412	3.64	39.48
200	19.236	12.348	2.786	34.44
300	15.372	10.612	1.9124	27.888
400	13.02	9.296	1.4644	23.772
500	11.368	8.316	1.19	20.86
700	9.128	6.888	0.868	16.884
1000	7.14	5.516	0.6216	13.272
